# Supplementary material for: Exploring locked nucleic acids as a bio-inspired materials assembly and disassembly tool
Source: Royal Society of Chemistry journal article supplement (doi:10.1039/c2sm27021h), 2012-12-21
Supplement: c2sm27021h.pdf [file c2sm27021h.pdf]

## Electronic Supplementary Materials

### Exploring Locked Nucleic Acids as a Bioinspired Materials Assembly and Disassembly Tool

Ngozi A. Eze\*<sup>a</sup> and Valeria Tohver Milam<sup>a,b,c</sup>

<sup>a</sup> School of Materials Science and Engineering, Georgia Institute of Technology, 771 Ferst Drive NW, Atlanta, GA, USA 30032

<sup>b</sup> Wallace H. Coulter Department of Biomedical Engineering, Georgia Institute of Technology, 901 Atlantic Drive NW, Atlanta, GA, USA 30032

<sup>c</sup> Petit Institute for Bioengineering and Bioscience, Georgia Institute of Technology, 901 Atlantic Drive NW, Atlanta, GA, USA 30032

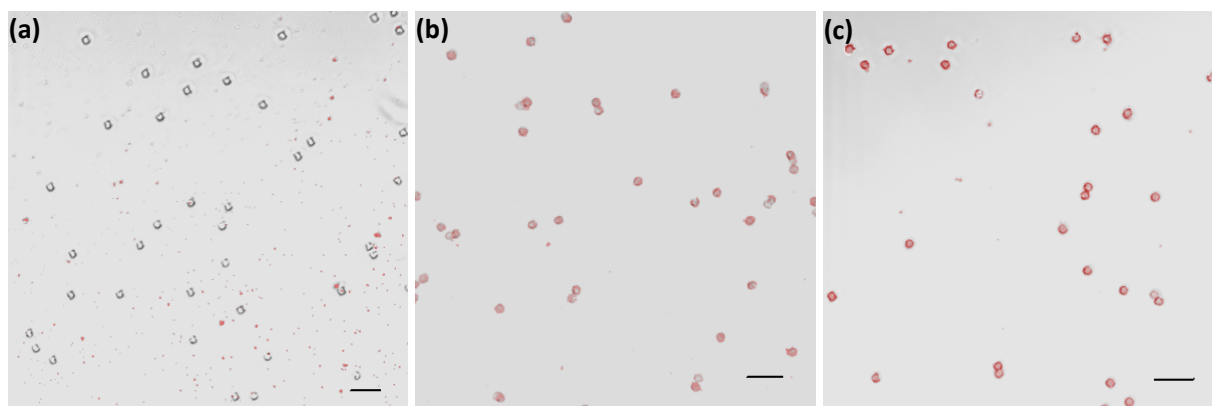

**Figure S1.** Confocal micrographs of colloidal satellite assemblies formed between nonfluorescent microspheres functionalized with  $L^3A20$  probe strands and fluorescent 200 nm particles functionalized with (a)  $L^3A20$ , (b)  $L^3M9$ , or (c)  $L^3B9$  target strands. Images are 3D compilations (DIC + fluorescence modes) of vertical z-stack micrographs taken from the same fields of view as Figure 5. Scale bars are 5  $\mu\text{m}$ .

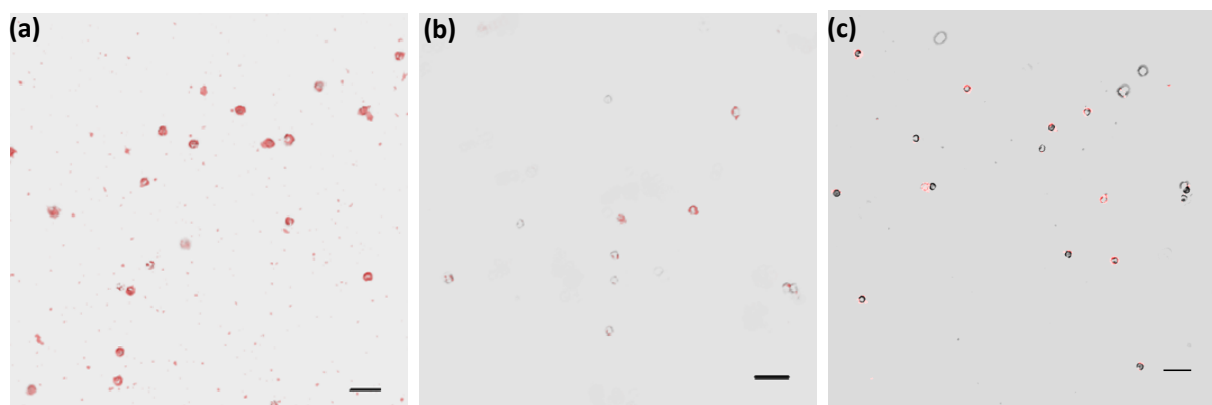

**Figure S2.** Confocal micrographs of suspensions of LNA-linked ( $L^3A20:L^3B9$ ) colloidal satellite assemblies following a 24 h incubation at 37 °C with (a) NC14, (b) B15, or (c)  $L^3B15$  secondary targets. Images are 3D compilations (DIC + fluorescence modes) of vertical z-stack micrographs taken from the same fields of view as Figure 6. Scale bars are 5  $\mu\text{m}$ .

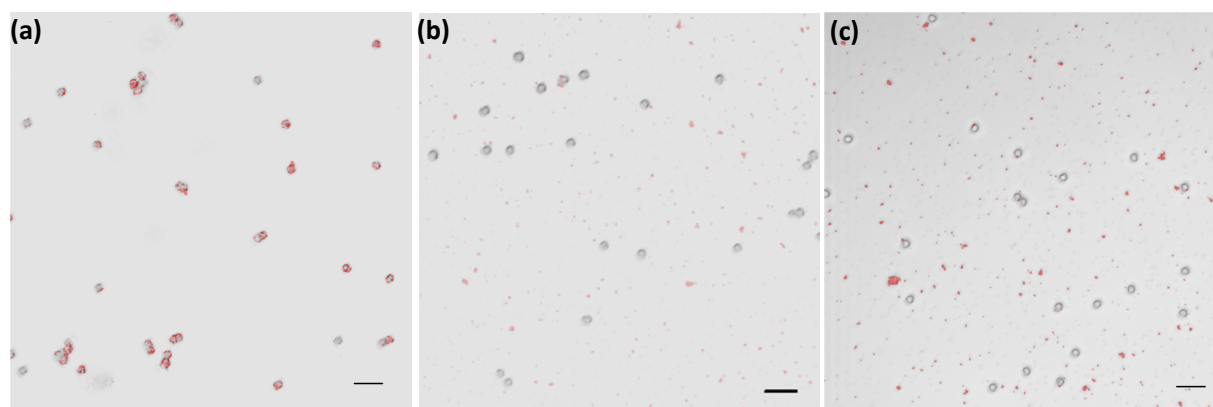

**Figure S3.** Confocal micrographs of suspensions of LNA-linked ( $L^3A20:L^3M9$ ) colloidal satellite assemblies following a 24 h incubation at 37 °C with (a) **NC14**, (b) **B15**, or (c)  $L^3B15$  secondary targets. Images are 3D compilations (DIC + fluorescence modes) of vertical z-stack micrographs taken from the same fields of view as Figure 7. Scale bars are 5  $\mu\text{m}$ .
